# Supplementary material for: Platelet Glycoprotein Ib α‐Chain as a Putative Therapeutic Target for Juvenile Idiopathic Arthritis: A Mendelian Randomization Study
Source: PubMed Central journal article supplement (PMC8048917; doi:10.1002/art.41561), 2021-02-21

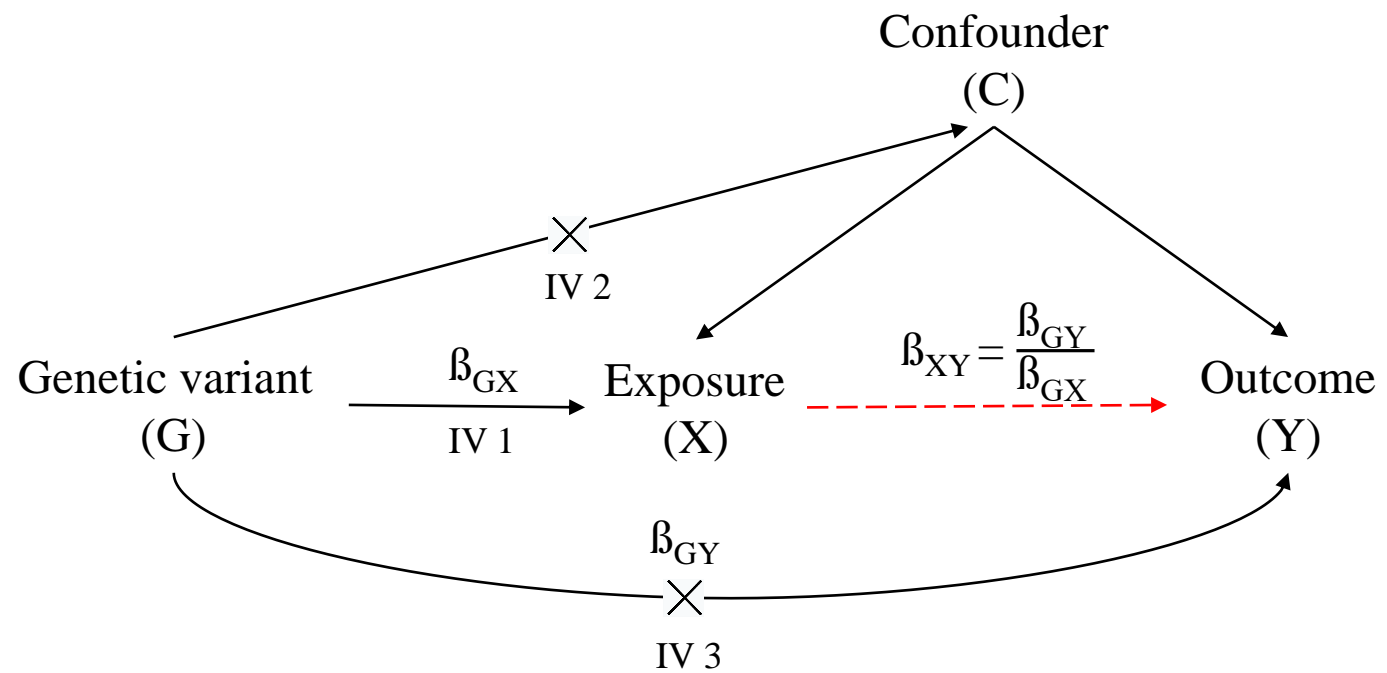

Supplement: ART-73-693-s002.pdf [file ART-73-693-s002.pdf]
